# Supplementary material for: An easy access to styrenes: trans aryl 1,3-, 1,4- and 1,5-dienes, and 1,3,5-trienes by Hiyama cross-coupling catalyzed by palladium nanoparticles
Source: Royal Society of Chemistry journal article supplement (doi:10.1039/c0nj01019g), 2011-01-01

## Supplementary material

### **An easy access to styrenes, *trans* aryl 1, 3-, 1, 4-, 1, 5-dienes and 1, 3, 5-trienes by Hiyama cross coupling catalyzed by palladium nanoparticles**

**Tanmay Chatterjee, Raju Dey and Brindaban C. Ranu**

| Table of Content                  | Page No. |
|-----------------------------------|----------|
| Copies of NMR Spectra in Table 2  | 2-18     |
| Copies of NMR spectra of Scheme 2 | 19-22    |

TC-185-1H (SR)

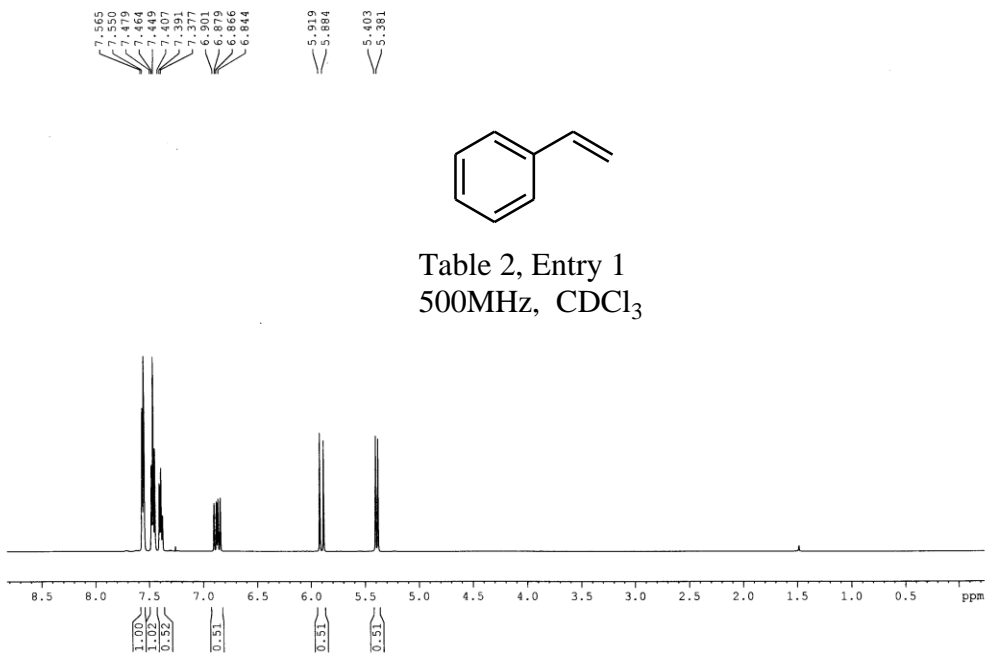

Table 2, Entry 1  
 500MHz, CDCl<sub>3</sub>

TC-185-13C (SR)

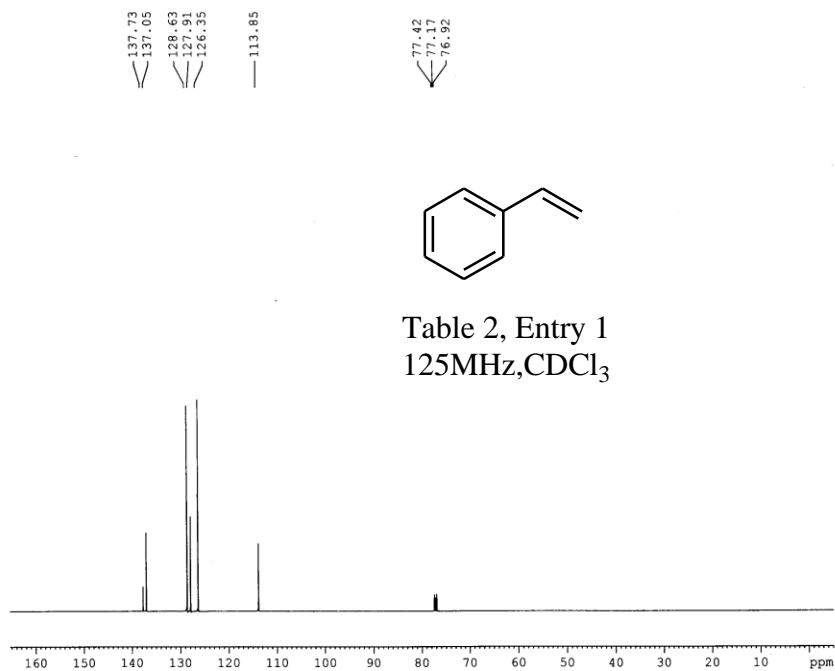

Table 2, Entry 1  
 125MHz, CDCl<sub>3</sub>

```

NAME          TC-185-13C
EXPNO         1
PROCNO        1
Date_         20100514
Time          18.08
INSTRUM       spect
PROBHD        5 mm PABBO BB-
PULPROG       zgpg30
TD            32768
SOLVENT       CDCl3
NS            1024
DS            4
SWH           29761.904 Hz
FIDRES        0.908261 Hz
AQ            0.5505524 sec
RG            32
SW           16.800 usec
DE            6.50 usec
TE            300.2 K
D1            2.0000000 sec
D11           0.0300000 sec
TD0           1

----- CHANNEL f1 -----
NUC1          13C
P1            9.88 usec
PL1           0.50 dB
PL1W          82.16106415 W
SFO1          125.7703643 MHz

----- CHANNEL f2 -----
CPDPRG2       waltz16
NUC2          1H
PCPD2         80.00 usec
PL2           1.00 dB
PL12          16.50 dB
PL13          20.00 dB
PL2W          15.50319813 W
PL12W         0.43693921 W
PL13W         0.19517358 W
SFO2          500.1320005 MHz
SI            16384
SF            125.7577933 MHz
WDW           EM
SSB           0
LB            1.00 Hz
GB            0
PC            1.00
    
```

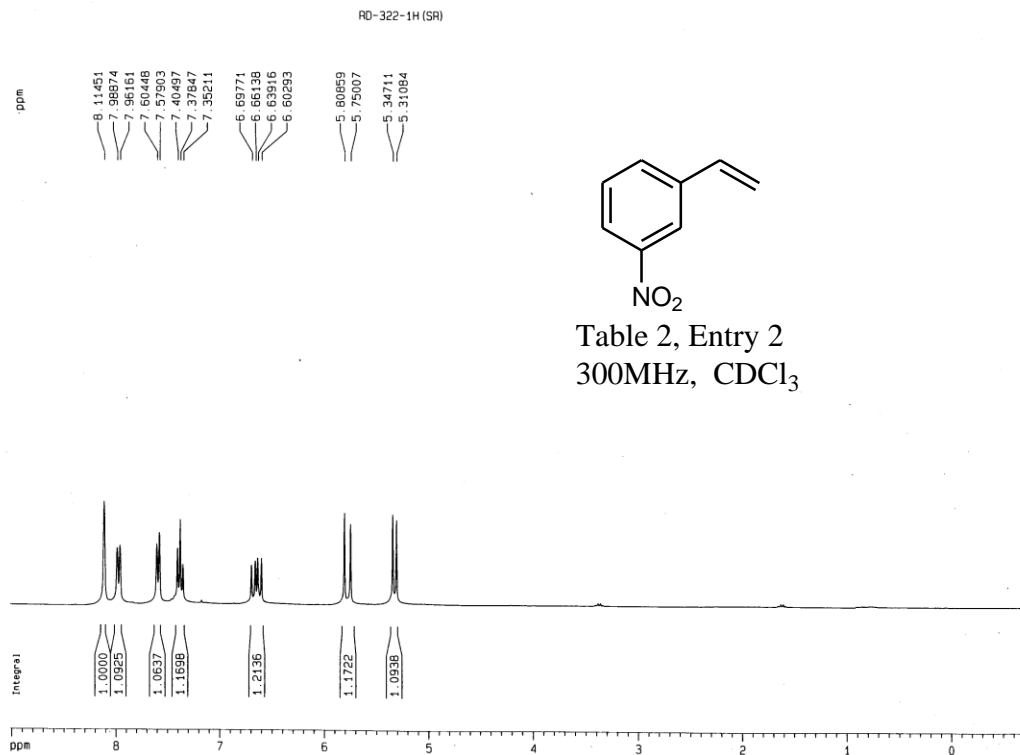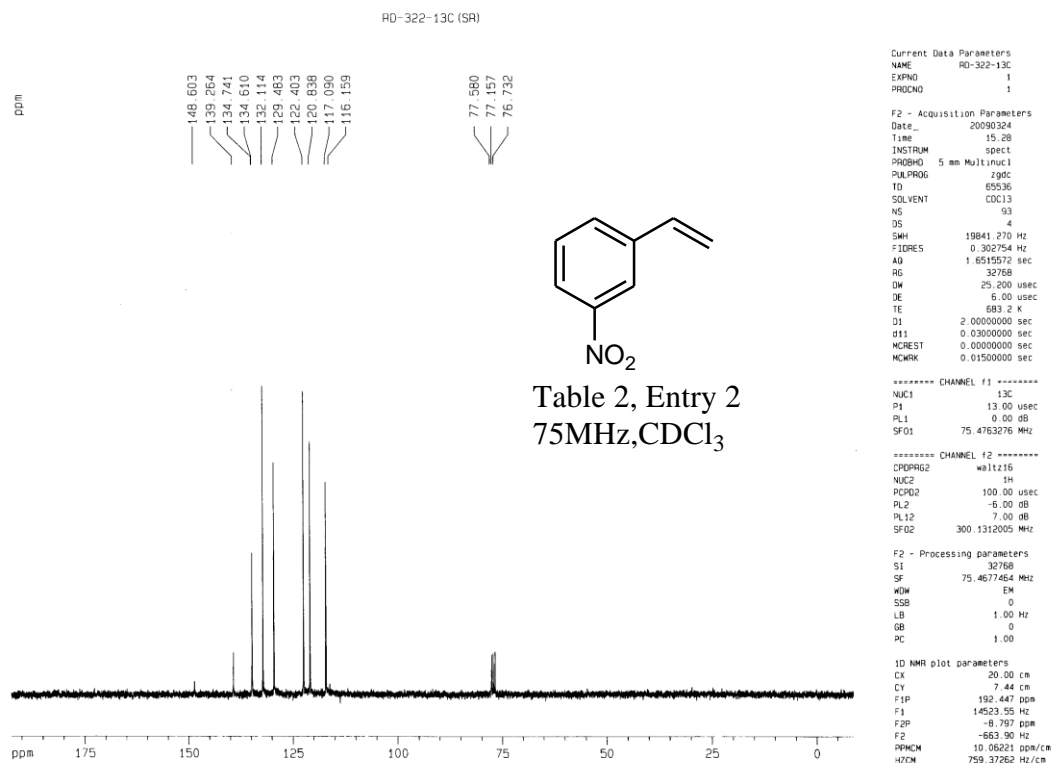

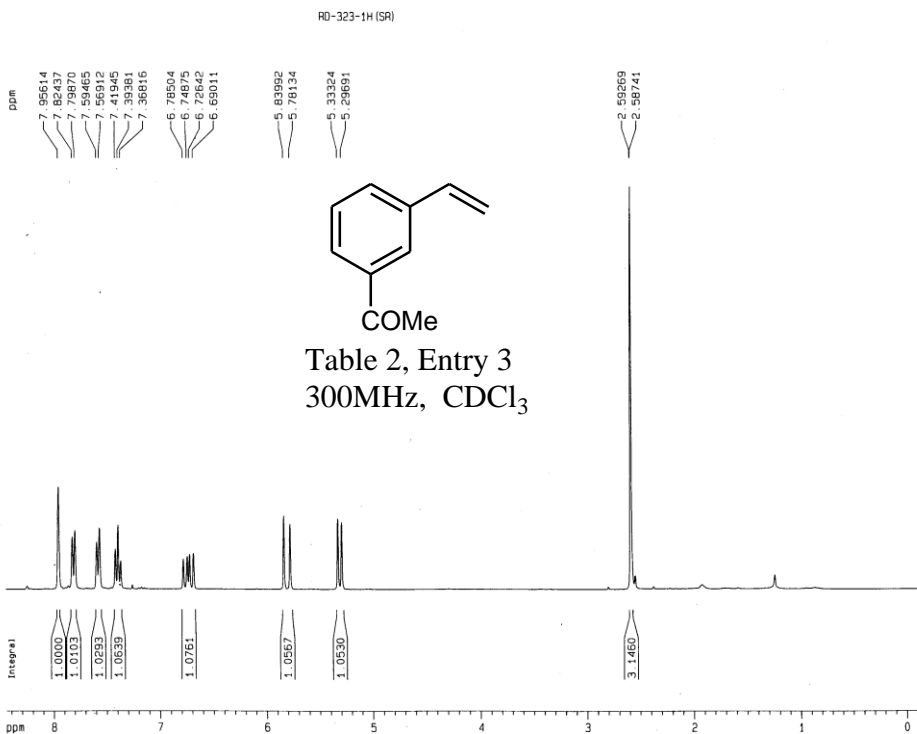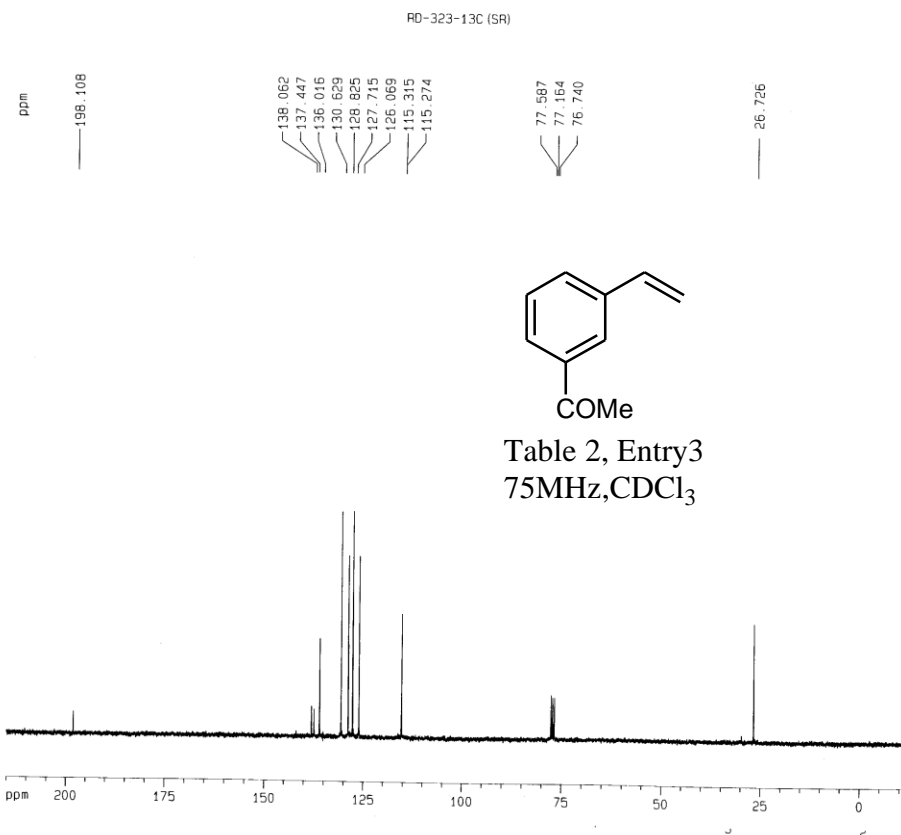

Current Data Parameters  
 NAME RD-323-13C  
 EXPNO 1  
 PROCNO 1

F2 - Acquisition Parameters  
 Date\_ 20090324  
 Time 18.21  
 INSTRUM spect  
 PROBN 5 mm Multinucl  
 PULPROG zgpg  
 ID 65336  
 SOLVENT CDCl3  
 NS 89  
 DS 4  
 SWH 19841.270 Hz  
 FIDRES 0.302754 Hz  
 AQ 1.6515572 sec  
 RG 32768  
 DW 25.200 usec  
 DE 6.00 usec  
 TE 0.0 K  
 D1 2.00000000 sec  
 d11 0.03000000 sec  
 MCREST 0.00000000 sec  
 MCWK 0.01500000 sec

\*\*\*\*\* CHANNEL f1 \*\*\*\*\*  
 NUC1 13C  
 P1 13.00 usec  
 PL1 0.00 dB  
 SF01 75.4763276 MHz

\*\*\*\*\* CHANNEL f2 \*\*\*\*\*  
 CPDPRG2 waltz16  
 NUC2 1H  
 PCPD2 100.00 usec  
 PL2 -6.00 dB  
 PL12 7.00 dB  
 SF02 300.1312005 MHz

F2 - Processing parameters  
 S1 32768  
 SF 75.4677452 MHz  
 WDW EM  
 SSB 0  
 LB 1.00 Hz  
 GB 0  
 PC 1.00

ID NMR plot parameters  
 CX 20.00 cm  
 CY 5.03 cm  
 F1P 215.008 ppm  
 F1 16226.16 Hz  
 F2P -10.439 ppm  
 F2 -787.79 Hz  
 PPMCH 11.27233 ppm/cm  
 HZCM 850.69751 Hz/cm

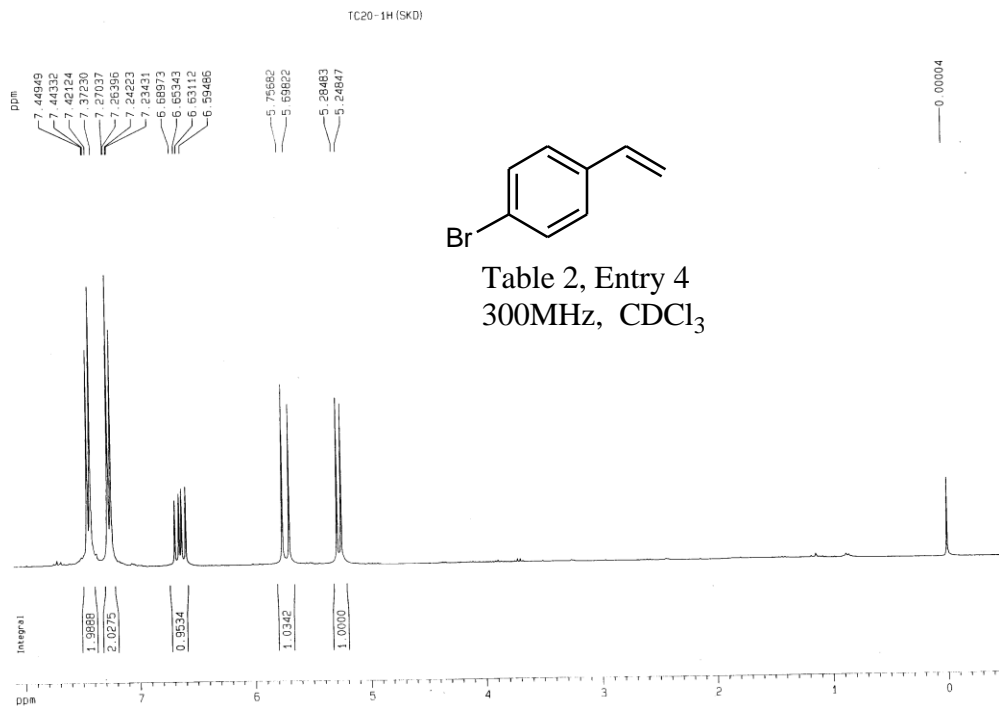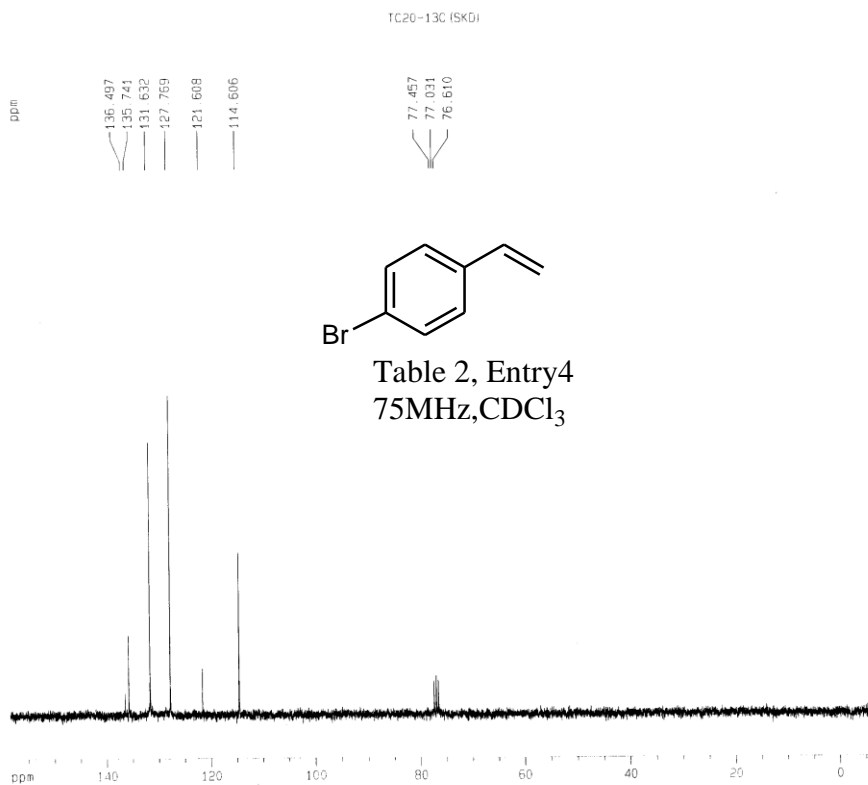

Current Data Parameters  
 NAME TC20-13C  
 EXPNO 1  
 PROCNO 1

F2 - Acquisition Parameters  
 Date\_ 20090810  
 Time 12.16  
 INSTRUM spect  
 PROBHD 5 mm Multinuc1  
 PULPROG zgpg  
 TD 65536  
 SOLVENT CDCl3  
 NS 70  
 DS 4  
 SWH 19841.270 Hz  
 FIDRES 0.302754 Hz  
 AQ 1.6519572 sec  
 RG 32768  
 DW 25.200 usec  
 DE 6.00 usec  
 TE 300.2 K  
 D1 2.0000000 sec  
 d11 0.0300000 sec  
 ACQRES 0.0000000 sec  
 MCWRT 0.01500000 sec

\*\*\*\*\* CHANNEL f1 \*\*\*\*\*  
 NUC1 13C  
 P1 13.00 usec  
 PL1 0.00 dB  
 SFO1 75.4763276 MHz

\*\*\*\*\* CHANNEL f2 \*\*\*\*\*  
 CPDPRG2 waltz16  
 NUC2 1H  
 PCPD2 100.00 usec  
 PL2 -8.00 dB  
 PL12 7.00 dB  
 SFO2 300.1312005 MHz

F2 - Processing parameters  
 SI 32768  
 SF 75.4677490 MHz  
 WDM EM  
 SSB 0  
 LB 1.00 Hz  
 GB 0  
 PC 1.00

ID NMR plot parameters  
 CX 29.00 cm  
 CY 7.34 cm  
 F1P 158.391 ppm  
 F1 11953.41 Hz  
 F2P -6.645 ppm  
 F2 -501.50 Hz  
 FWHM 8.25181 ppm/cm  
 -ZCM 622.74591 Hz/cm

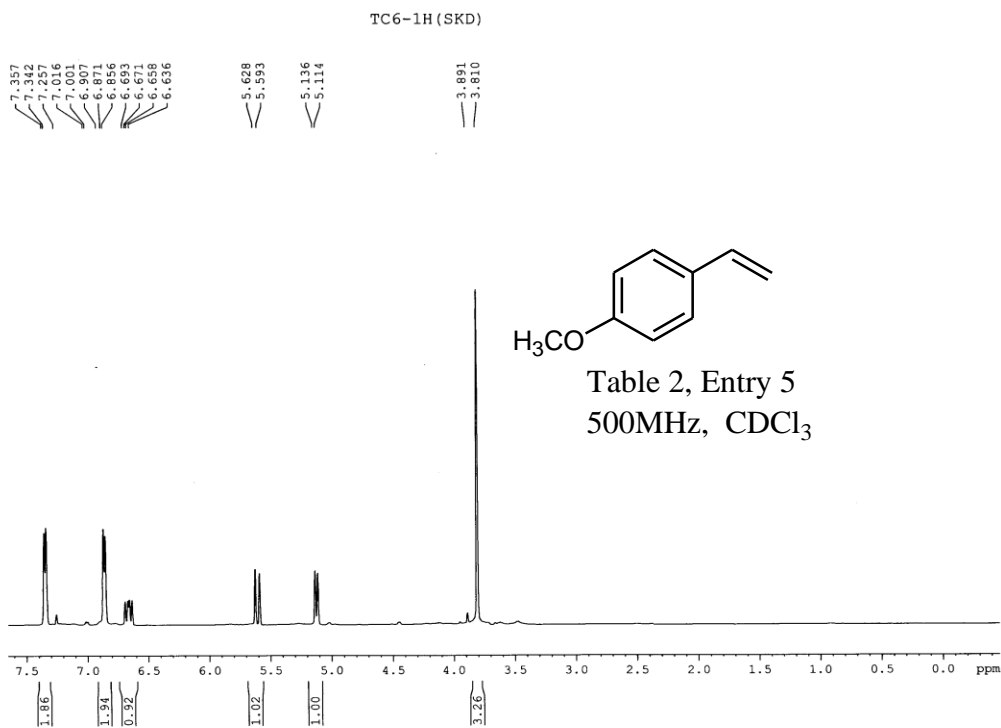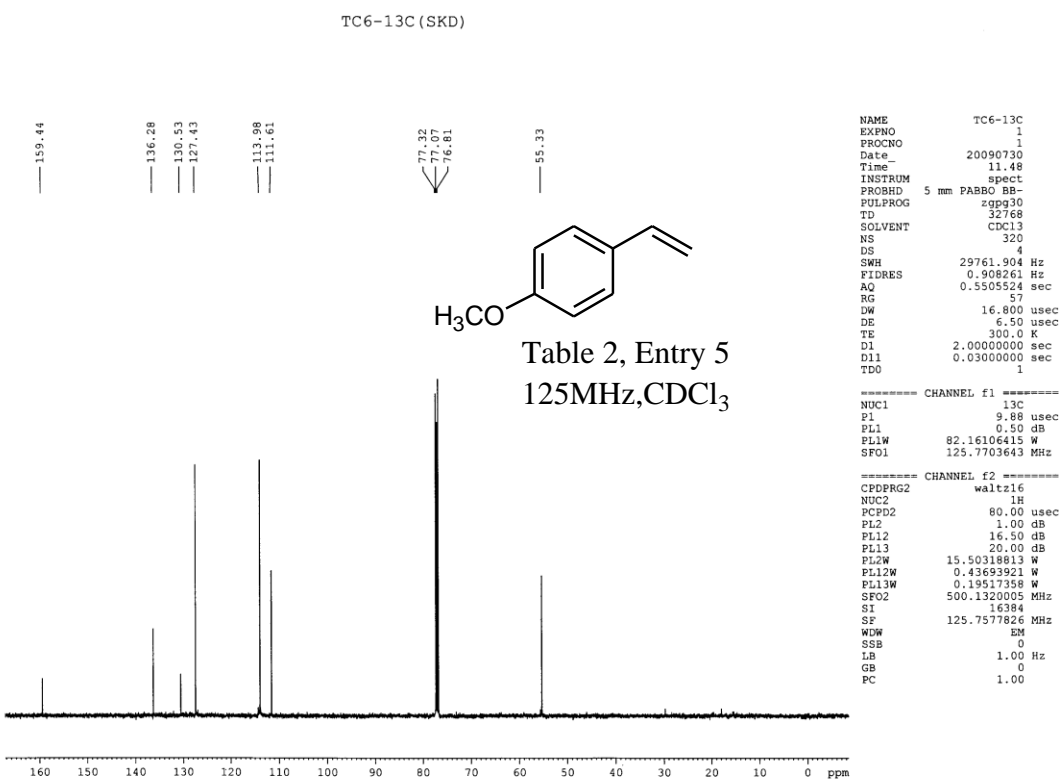

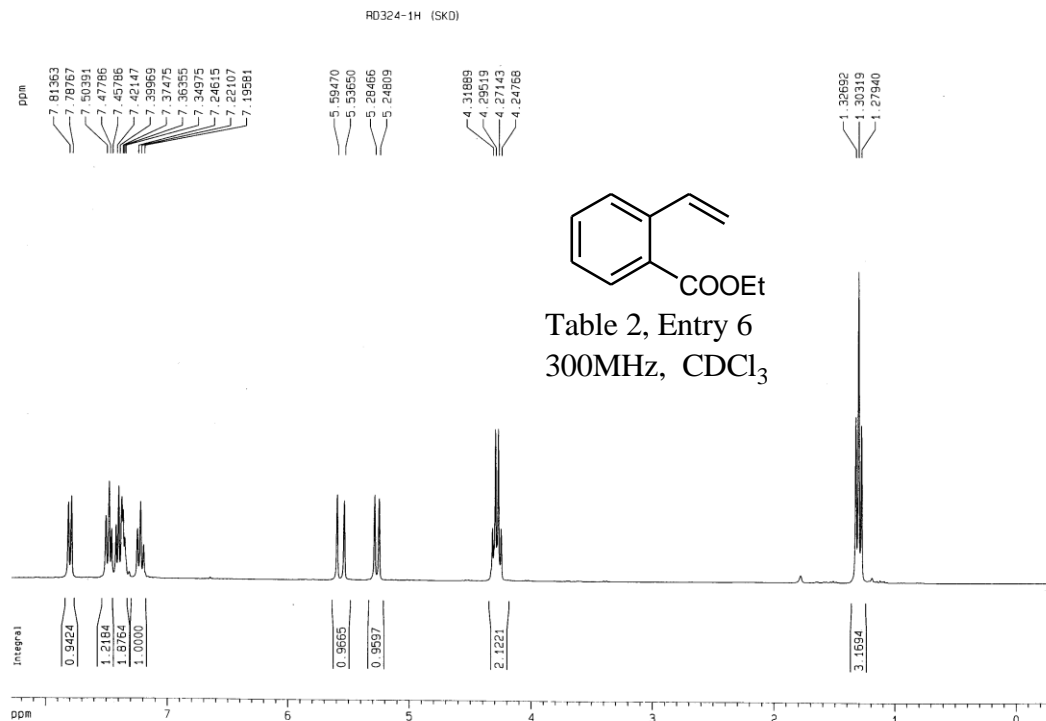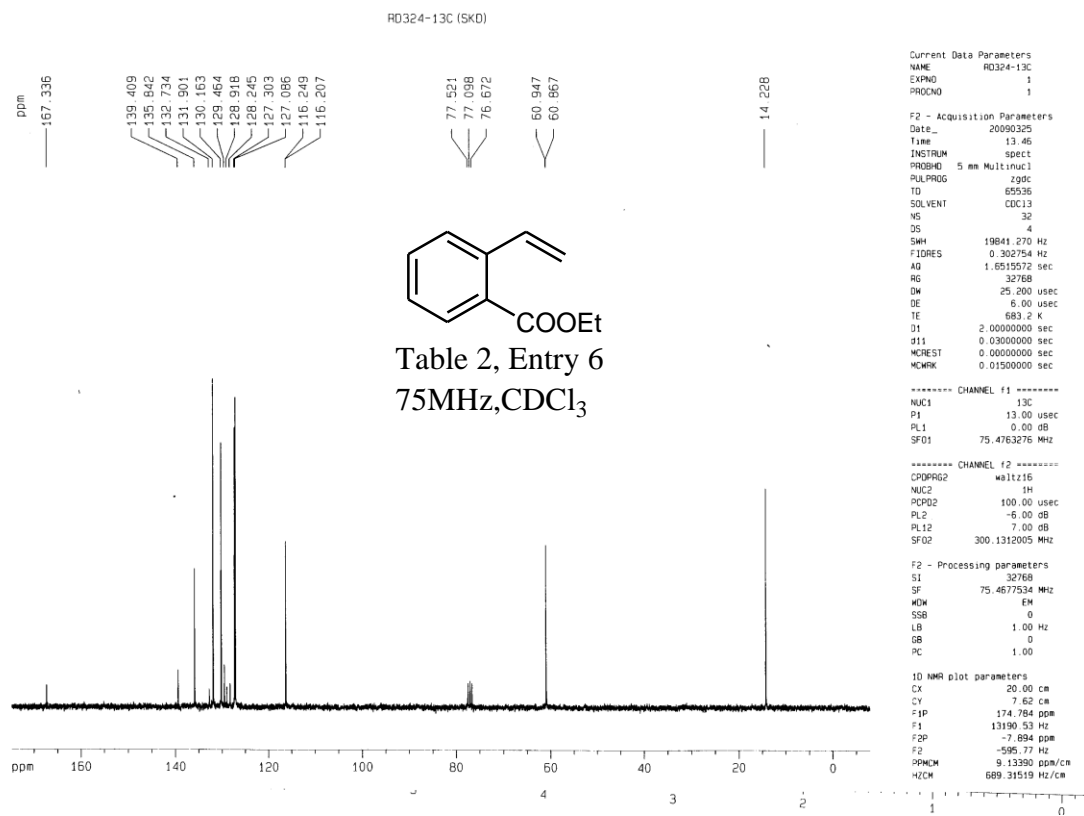

TC-106-1H (SR)

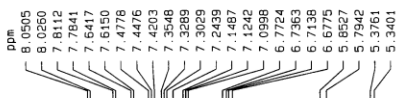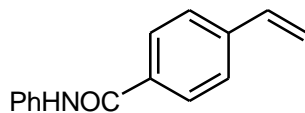

Table 2, Entry 7  
 300MHz, CDCl<sub>3</sub>

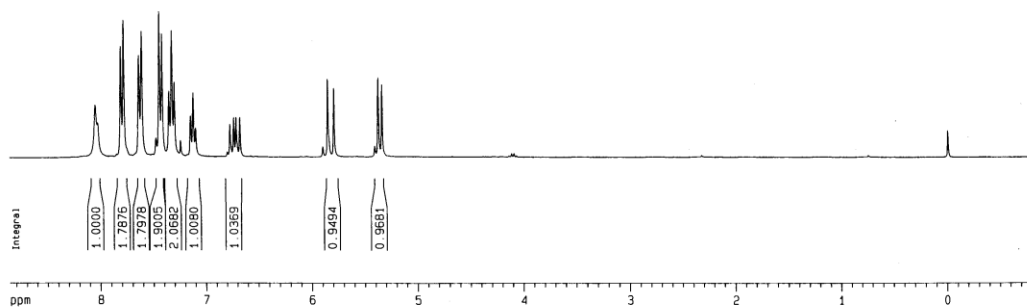

TC-106-13C (SR)

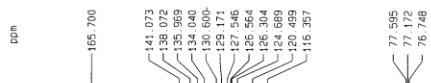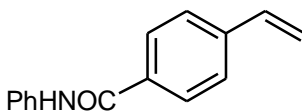

Table 2, Entry 7  
 75MHz, CDCl<sub>3</sub>

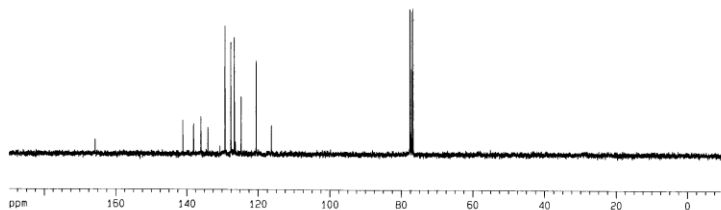

```

Current Data Parameters
NAME          TC-106-13C
EXPNO        1
PROCNO       1

F2 - Acquisition Parameters
Date_        20091209
Time         16.06
INSTRUM      spect
PROBHD       5 mm MUX11nc1
PULPROG      zgpg30
TD           65536
SOLVENT      CDCl3
NS           65
DS           4
SHE         18939.305 Hz
FIDRES      0.288992 Hz
AQ          1.7302004 sec
RG          919.2
DM          26.400 usec
DE          6.00 usec
TE          298.2 K
D1          2.0000000 sec
d11         0.2000000 sec
DELTA       1.8999999 sec
WCHST1      0.0000000 sec
MORPH       0.0100000 sec

***** CHANNEL f1 *****
NUC1         13C
P1           15.75 usec
PL1          0.00 dB
SFO1         75.4761211 MHz

***** CHANNEL f2 *****
CPDPRG2     waltz16
NUC2         1H
P2           100.00 usec
PL2          -6.00 dB
PL12         6.00 dB
PL13         12.00 dB
SFO2         300.1312005 MHz

F2 - Processing parameters
SI           32768
SF           75.4677410 MHz
WDW          EM
SSB          0
LB           1.00 Hz
GB           0
PC           1.40

1D NMR plot parameters
CX           20.00 cm
CY           4.12 cm
F1P         189.9465008 MHz
F1          14327.25 Hz
F2P         -9.5895000 MHz
F2          -723.82 Hz
SFOH        6.9717200 MHz/cm
HZOH        752.5439200 Hz/cm
    
```



TC134-1H (SKD)

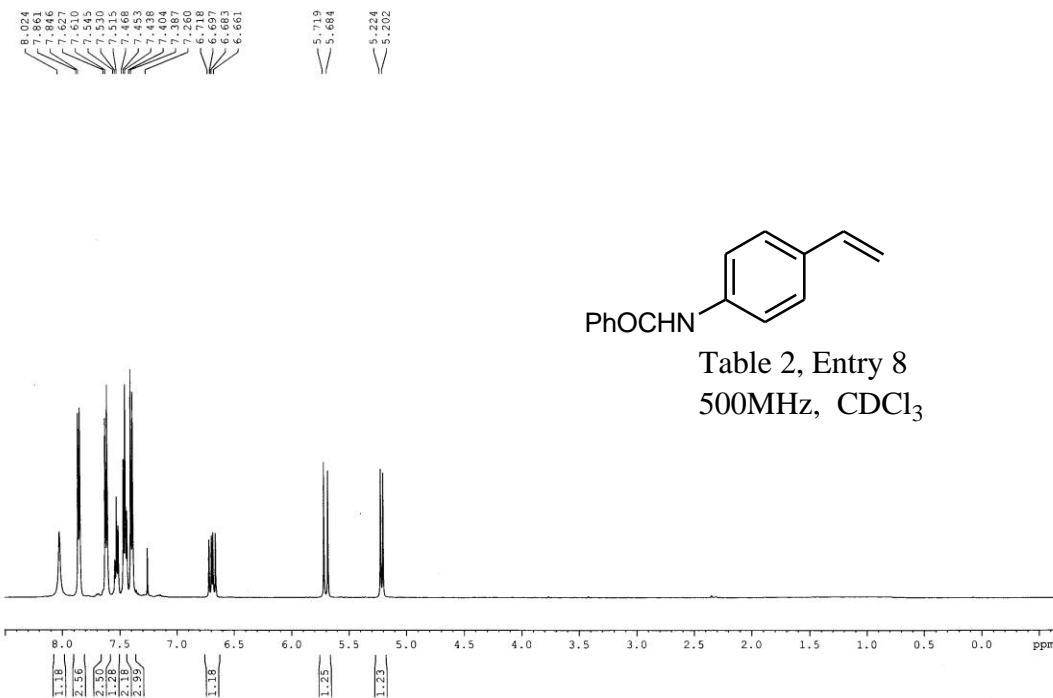

TC134-13C (SKD)

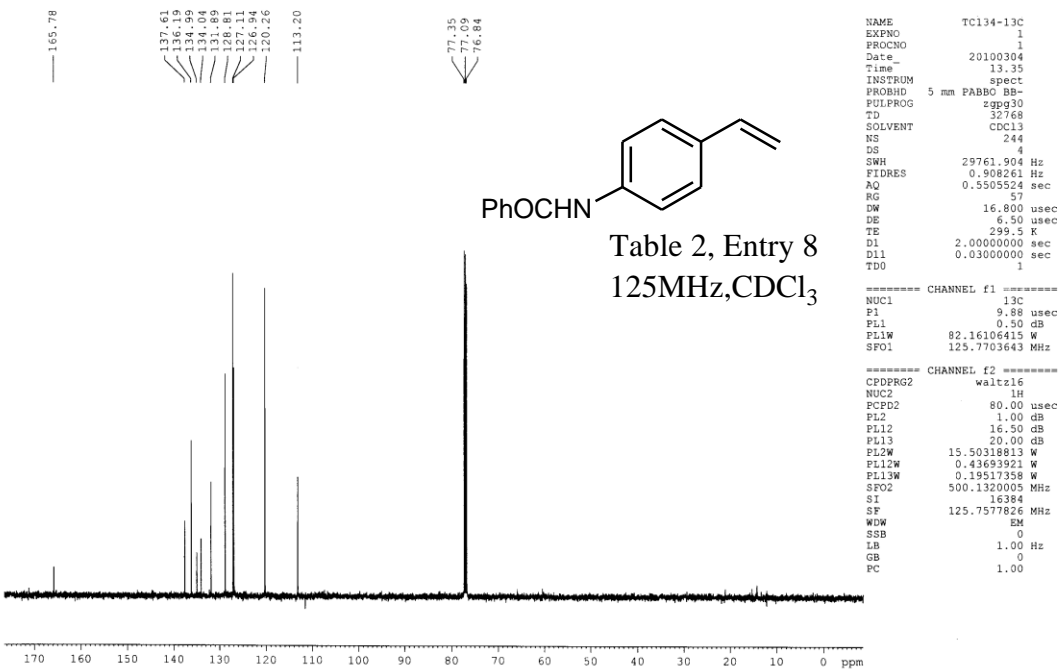

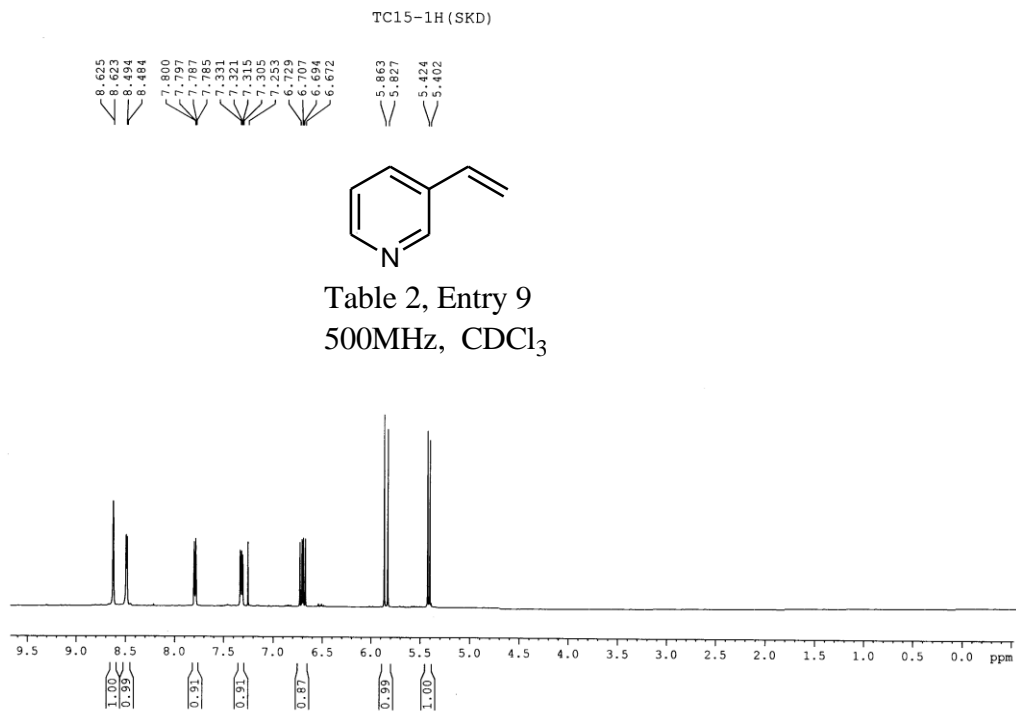

TC15-13C (SKD)

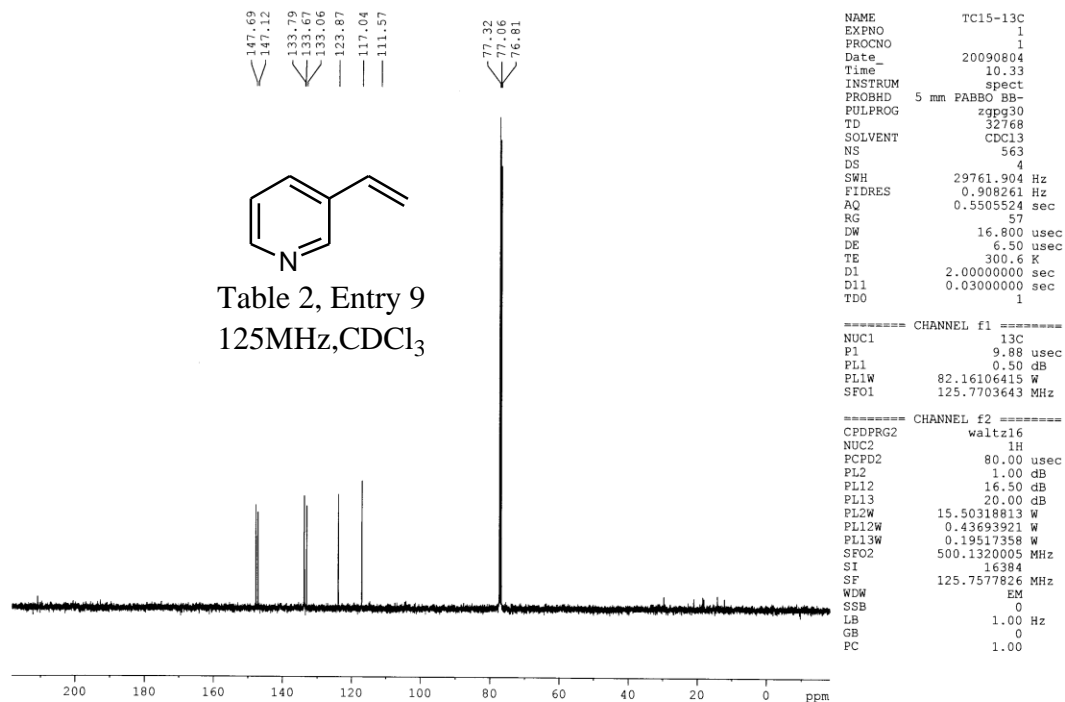

TC122-1H (SKD)

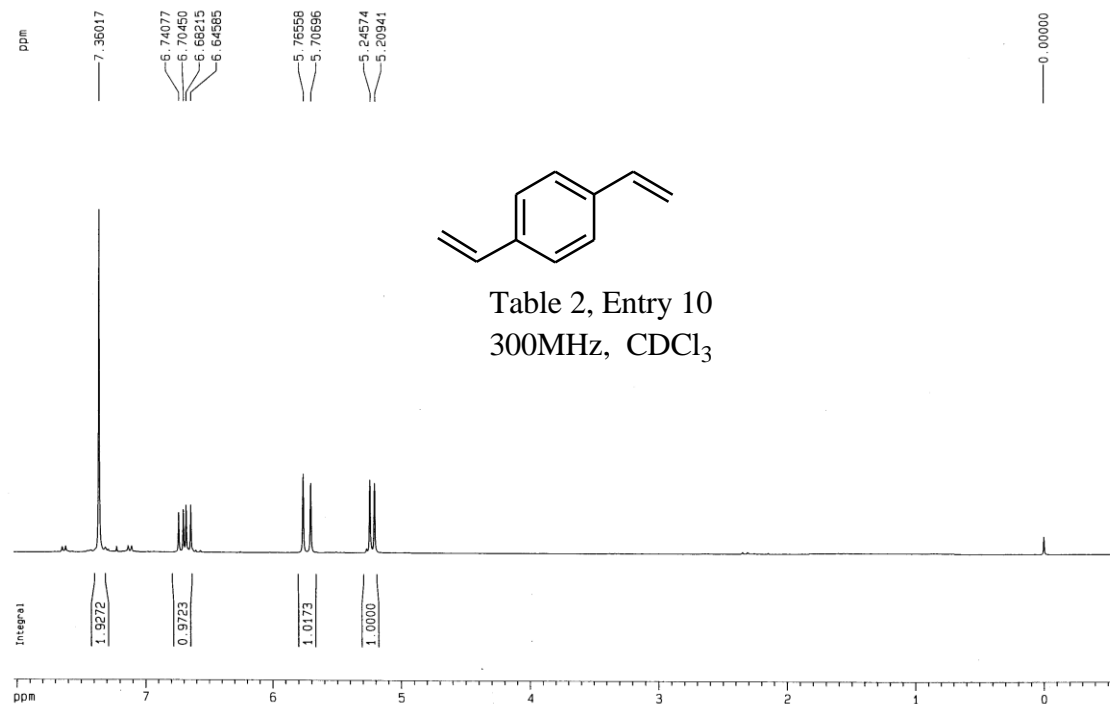

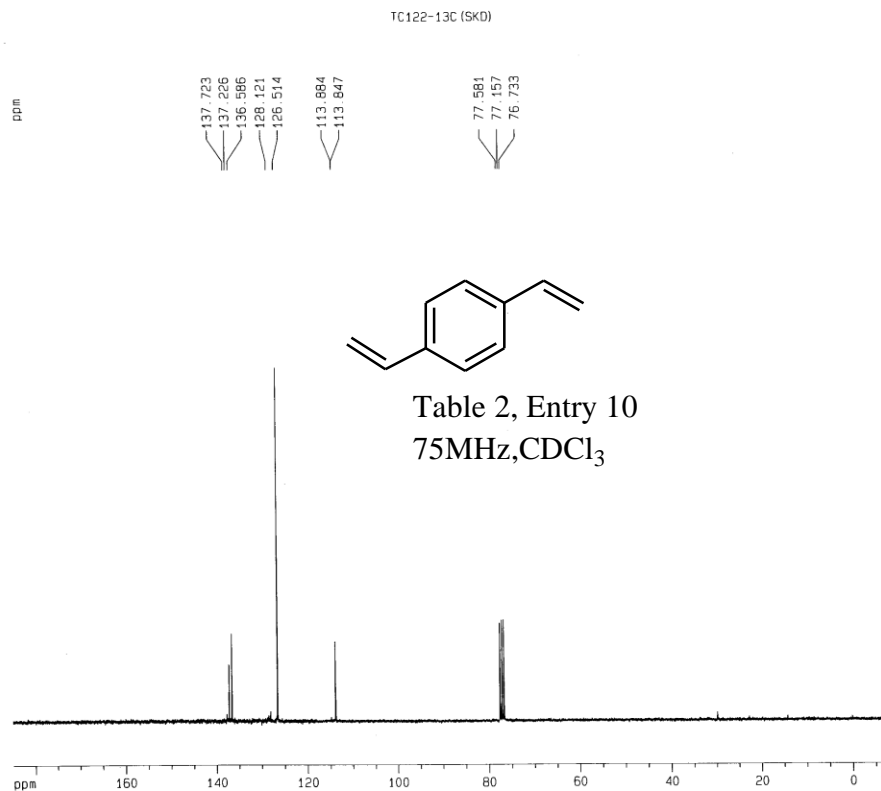

Current Data Parameters  
NAME TC122-13C  
EXPNO 1  
PROCNO 1

F2 - Acquisition Parameters  
Date\_ 20100127  
Time 14.16  
INSTRUM spect  
PROBHD 5 mm Multinuc1  
PULPROG zgpg30  
TD 65536  
SOLVENT CDCl3  
NS 190  
DS 4  
SWH 18939.395 Hz  
FIDRES 0.288992 Hz  
AQ 1.732204 sec  
RG 9195.2  
DW 26.400 usec  
DE 6.00 usec  
TE 297.2 K  
D1 2.0000000 sec  
d11 0.0300000 sec  
DELTA 1.89999998 sec  
MDELTA 0.0000000 sec  
MCWRR 0.0150000 sec

\*\*\*\*\* CHANNEL f1 \*\*\*\*\*  
NUC1 13C  
P1 11.75 usec  
PL1 0.00 dB  
SFO1 75.4783276 MHz

\*\*\*\*\* CHANNEL f2 \*\*\*\*\*  
CPDPRG2 waltz16  
NUC2 1H  
PCPD2 100.00 usec  
PL2 -6.00 dB  
PL12 8.00 dB  
PL13 12.00 dB  
SFO2 300.1312005 MHz

F2 - Processing parameters  
S1 32768  
SF 75.4677416 MHz  
WDW EM  
SSB 0  
LB 1.00 Hz  
GB 0  
PC 1.40

1D NMR plot parameters  
CX 20.00 cm  
CY 8.05 cm  
F1P 184.997 ppm  
F1 13961.34 Hz  
F2P -7.466 ppm  
F2 -563.44 Hz  
SFOCM 9.62317 ppm/cm  
HZCM 726.23683 Hz/cm

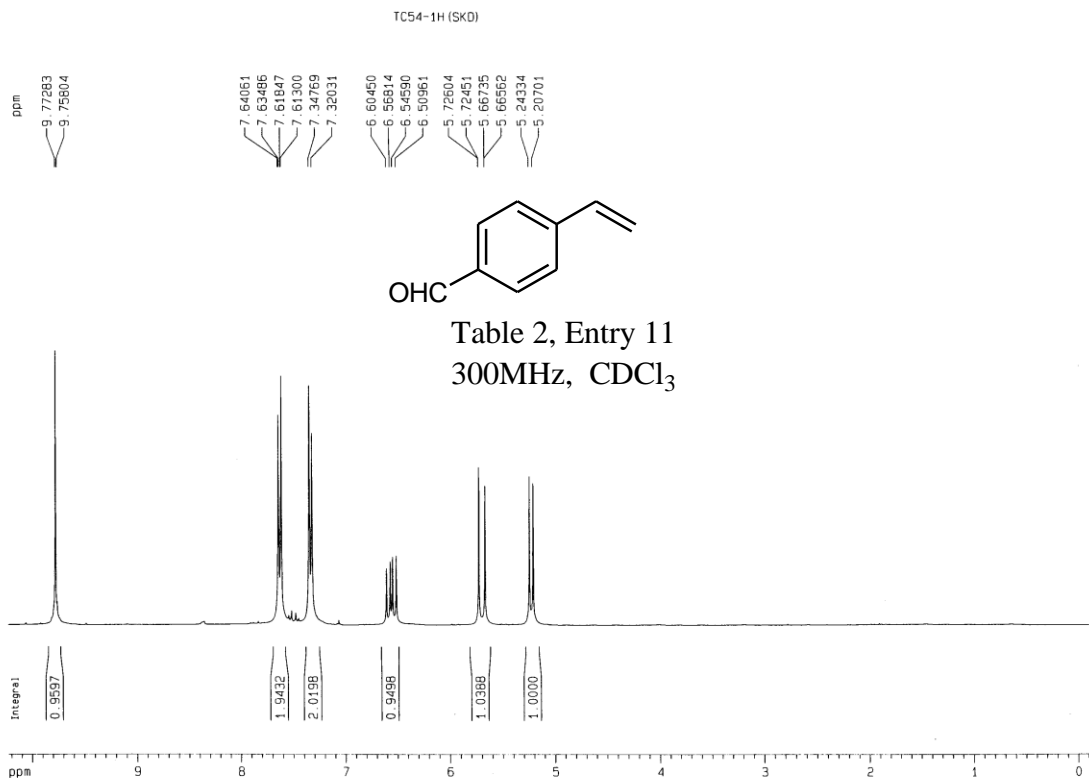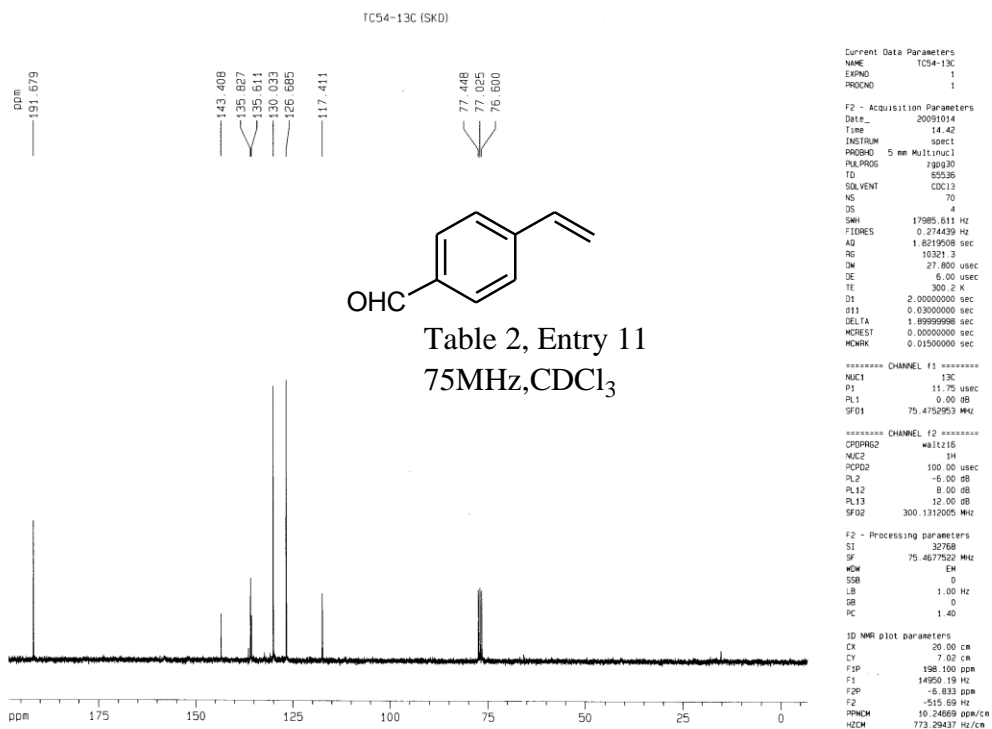

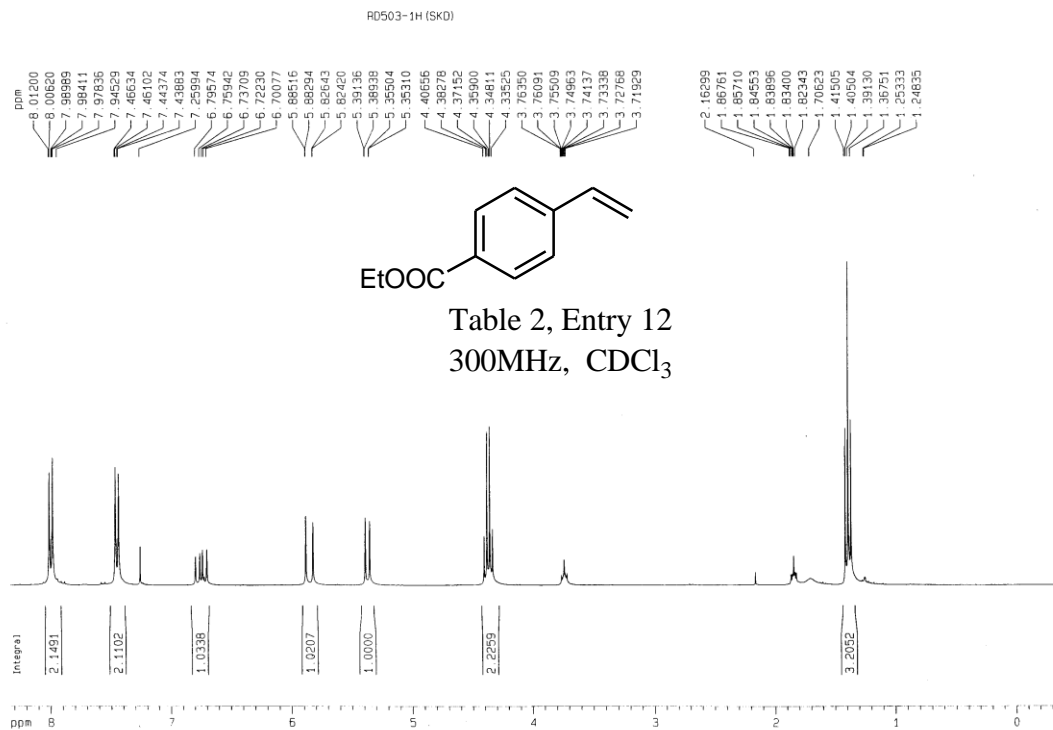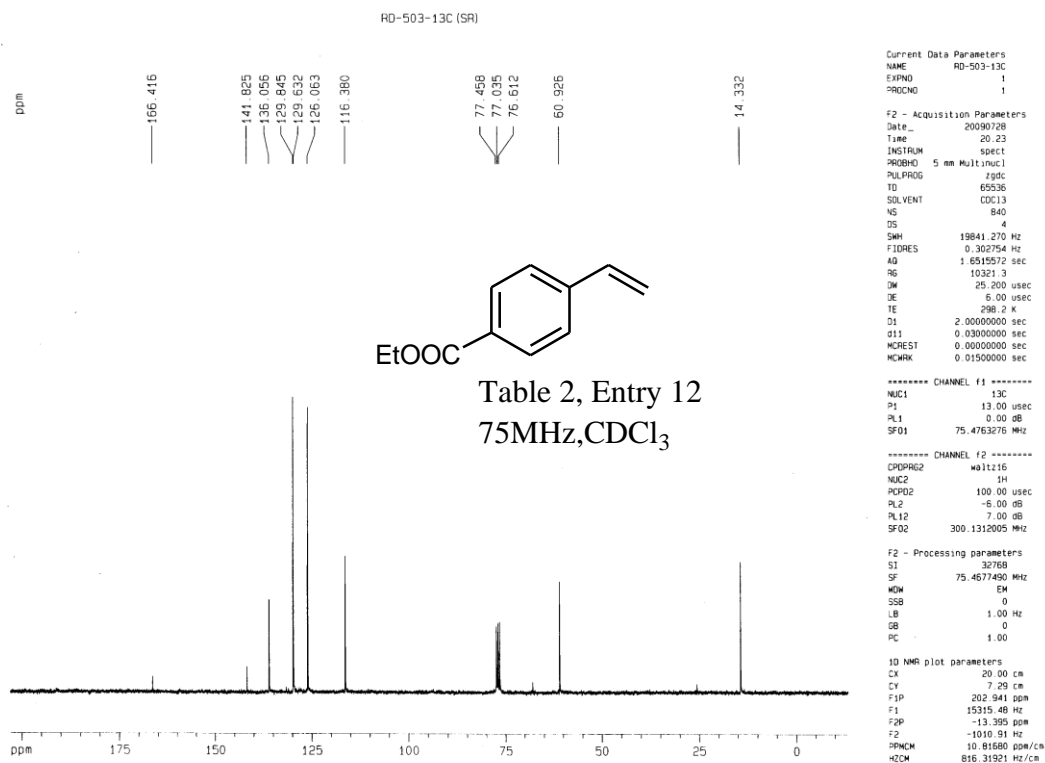

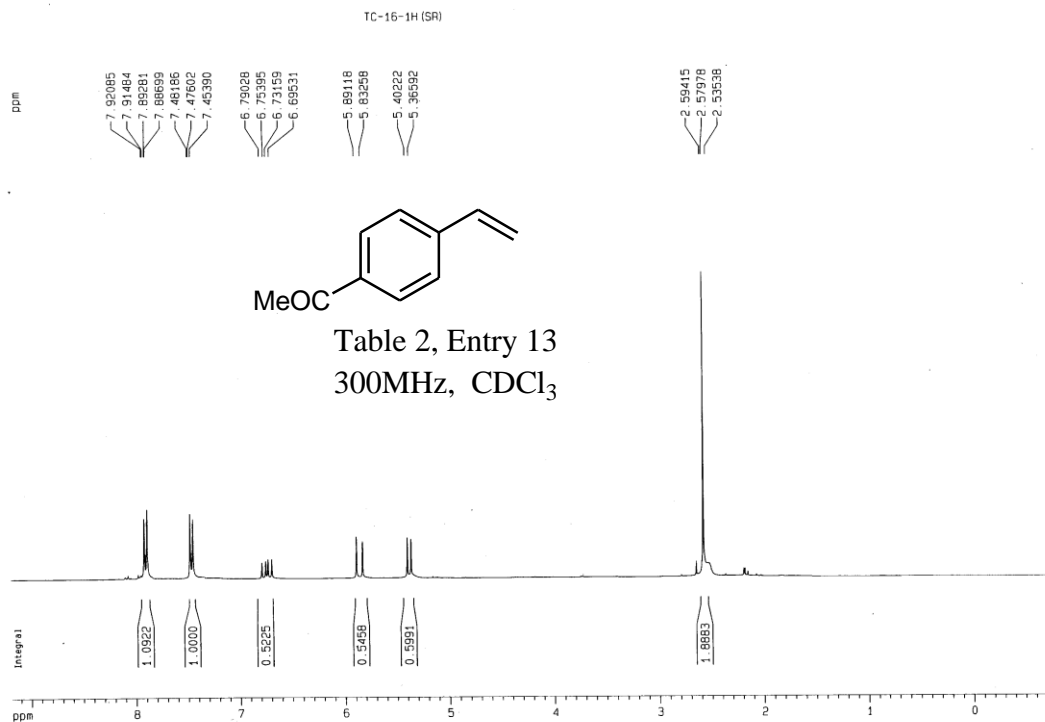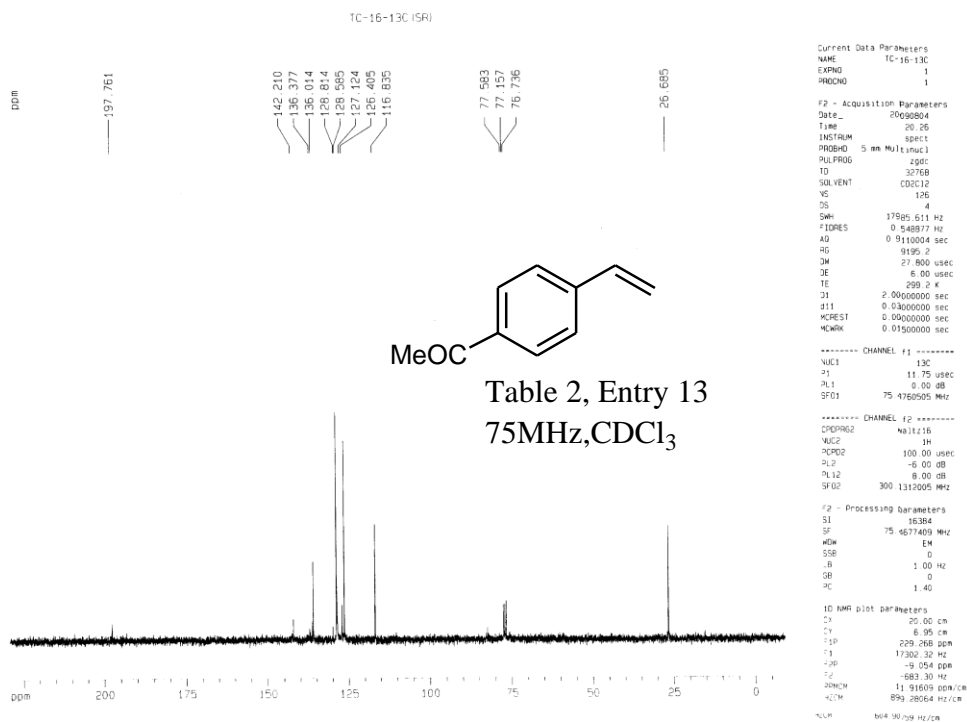

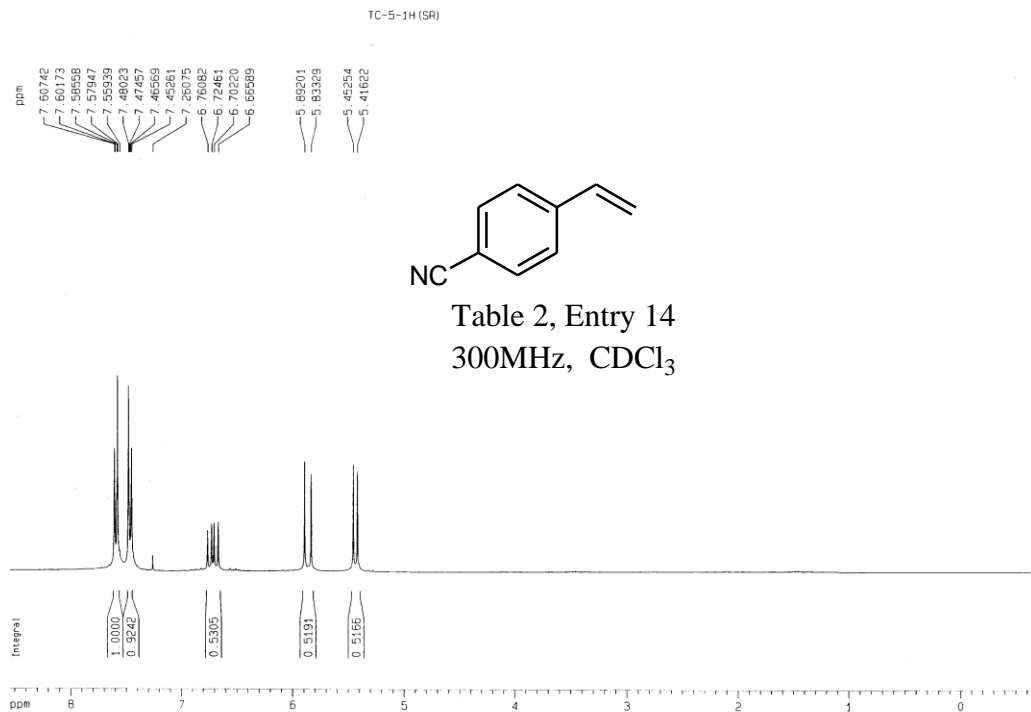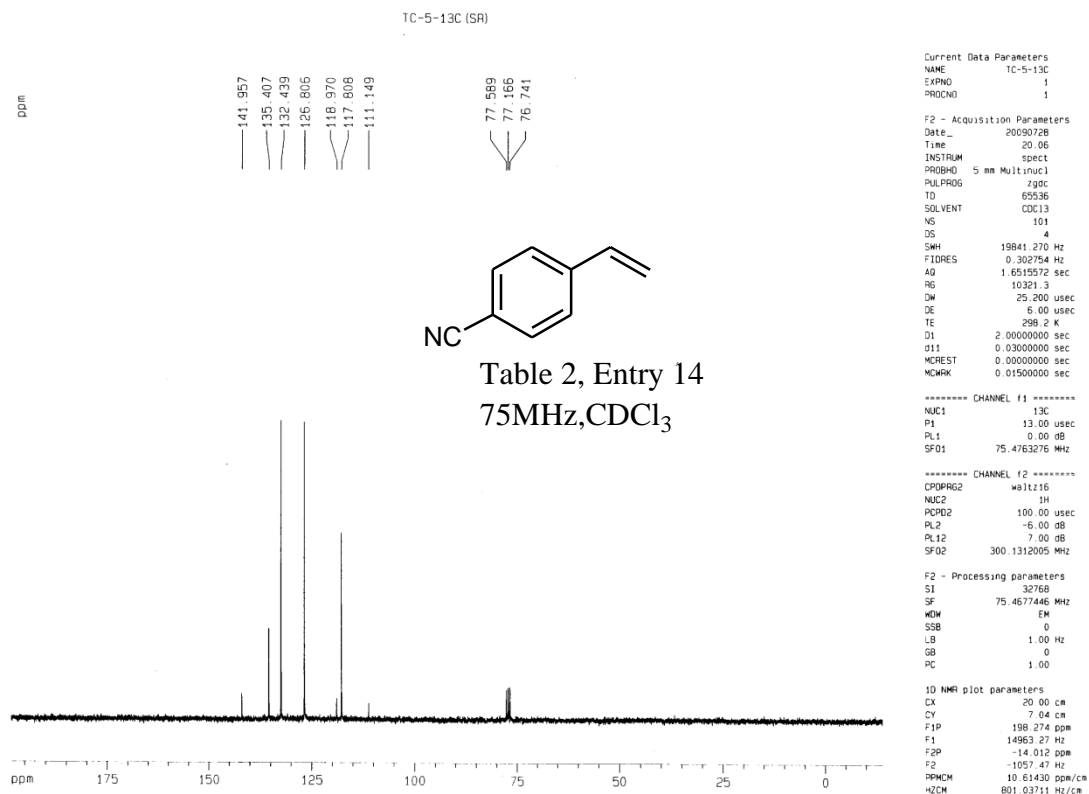



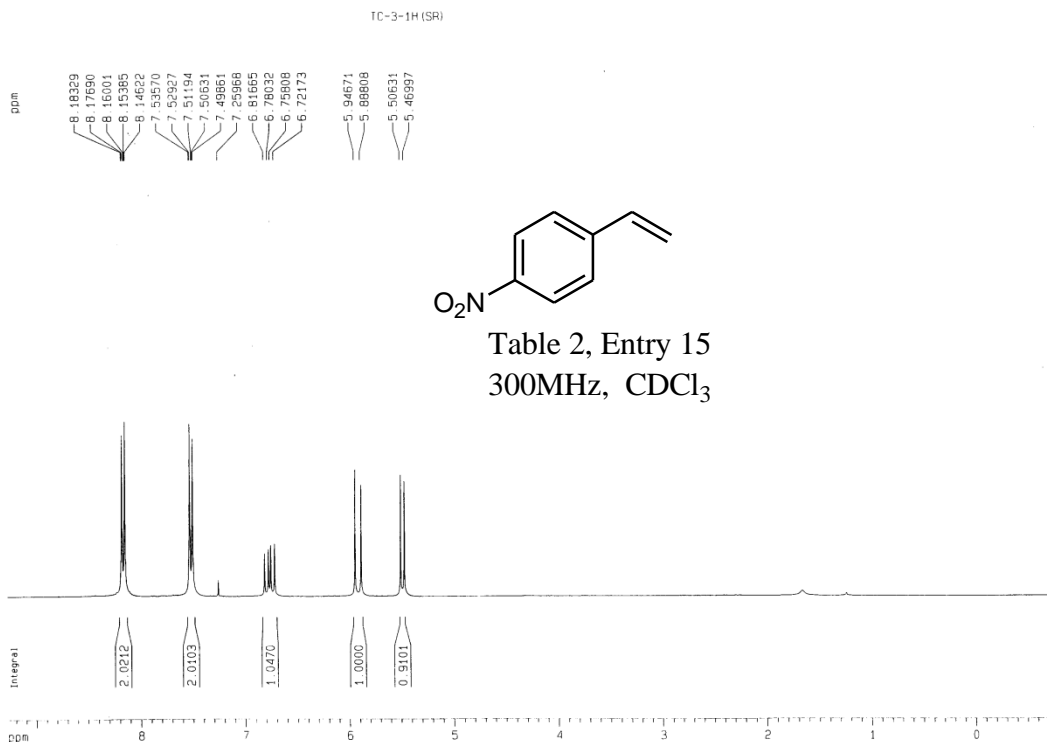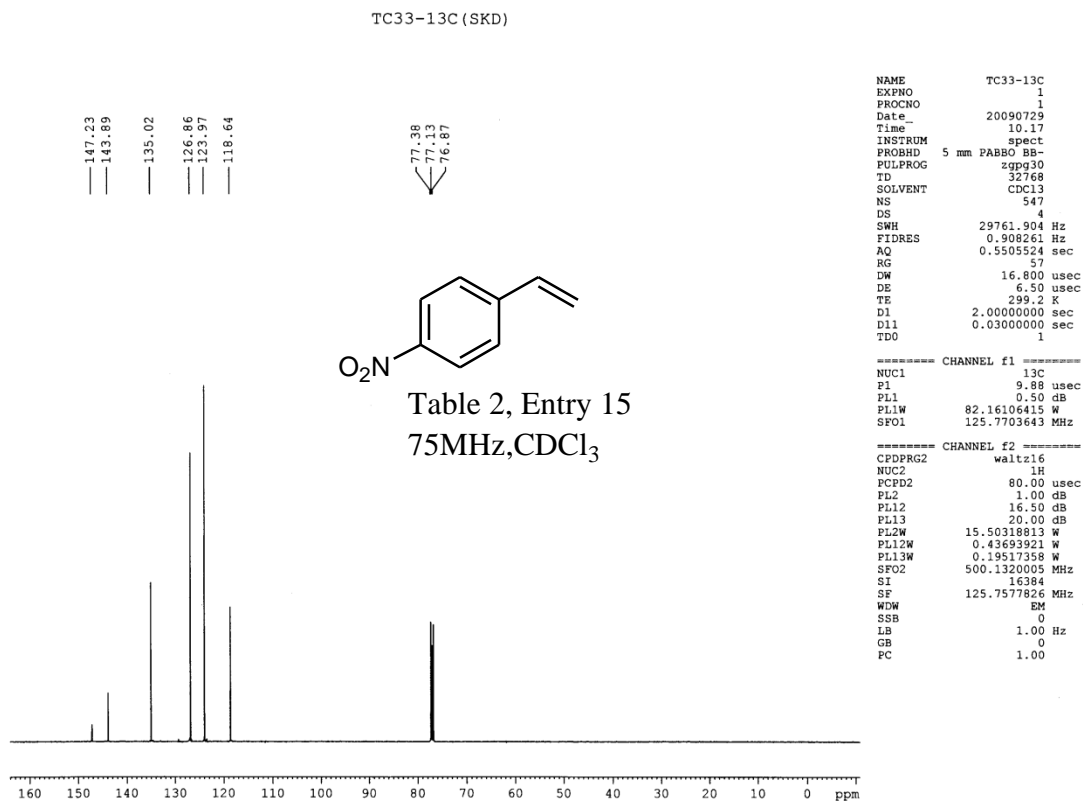

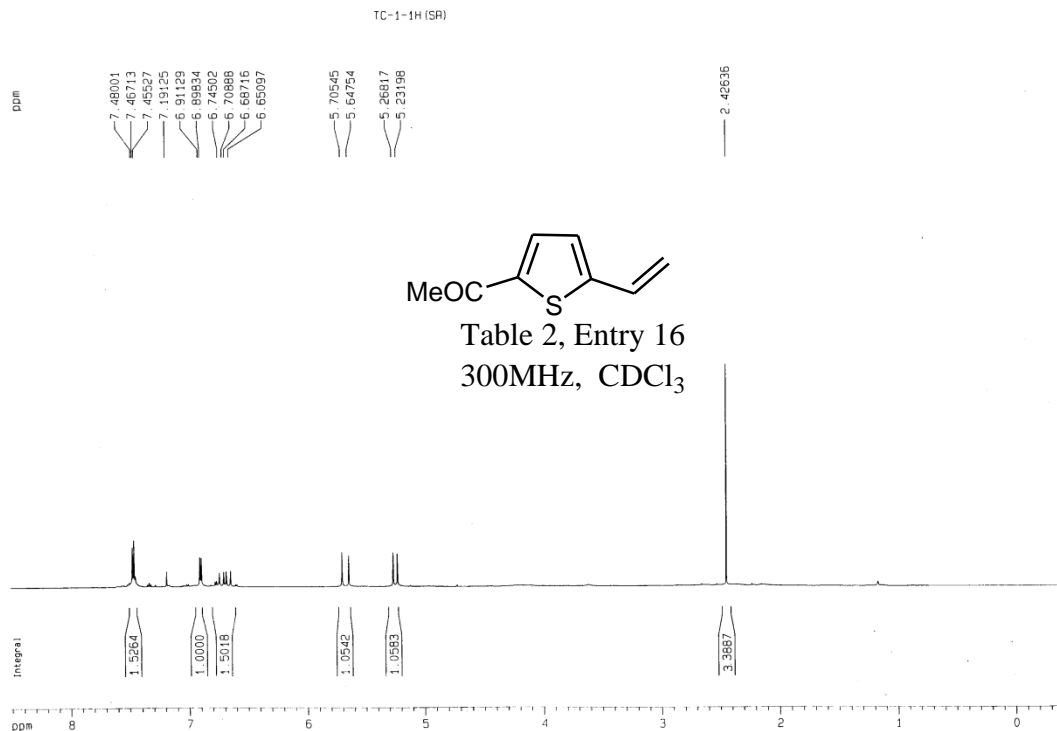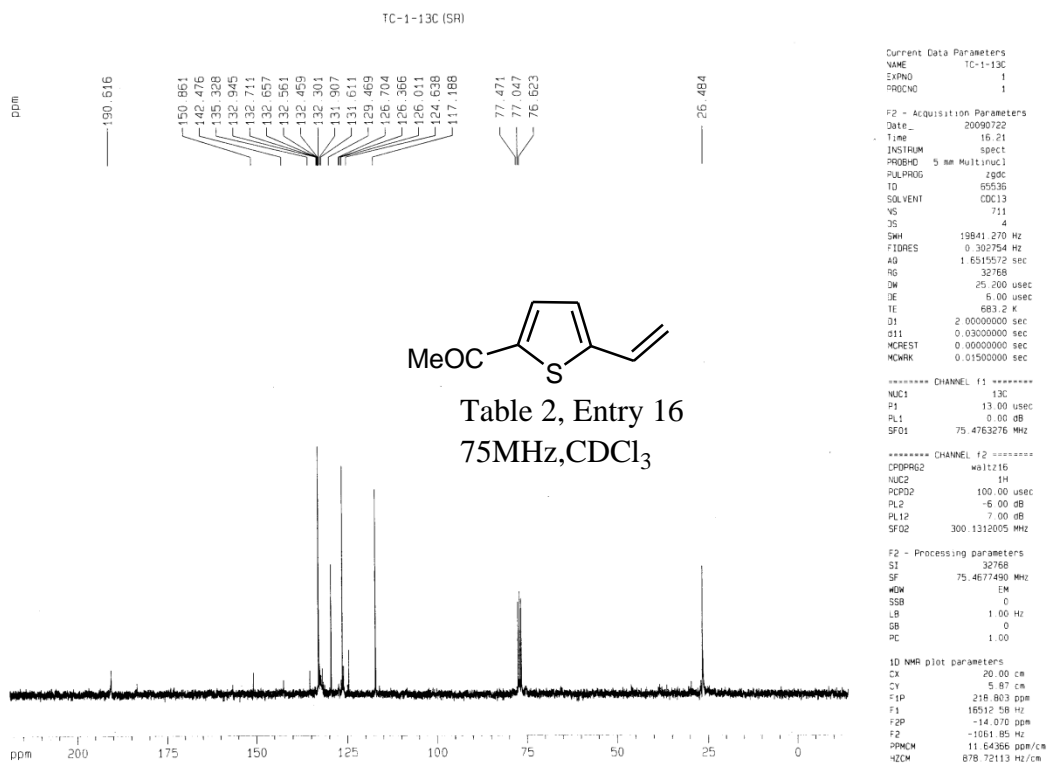

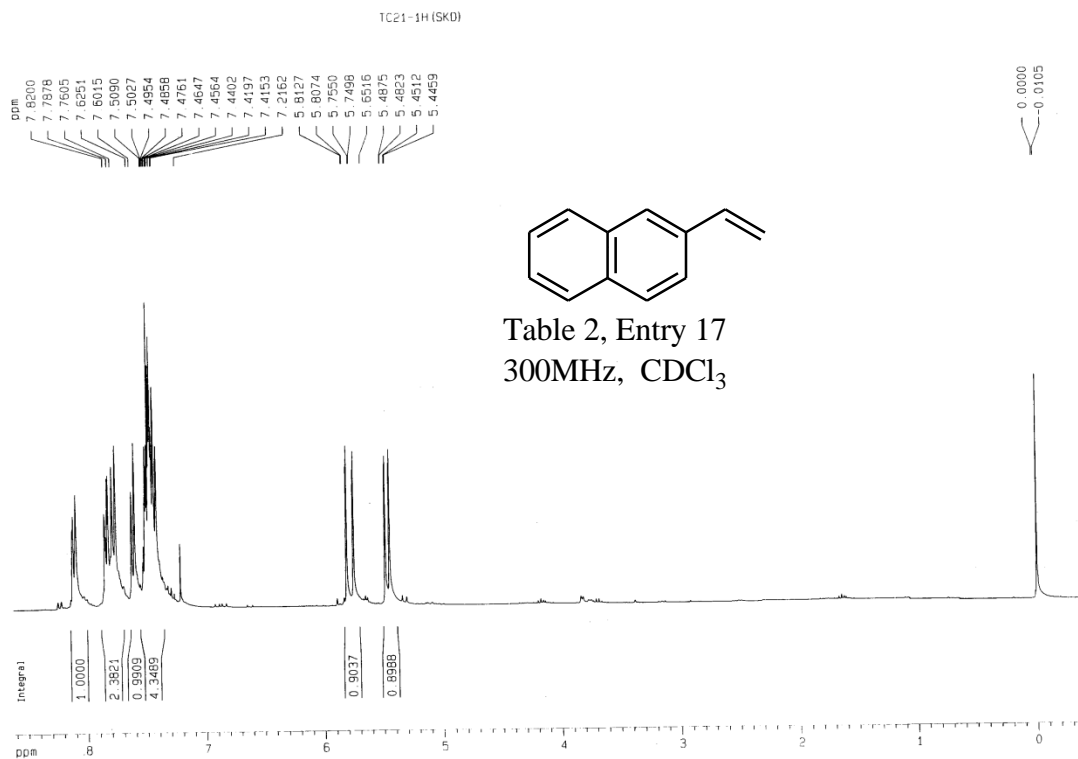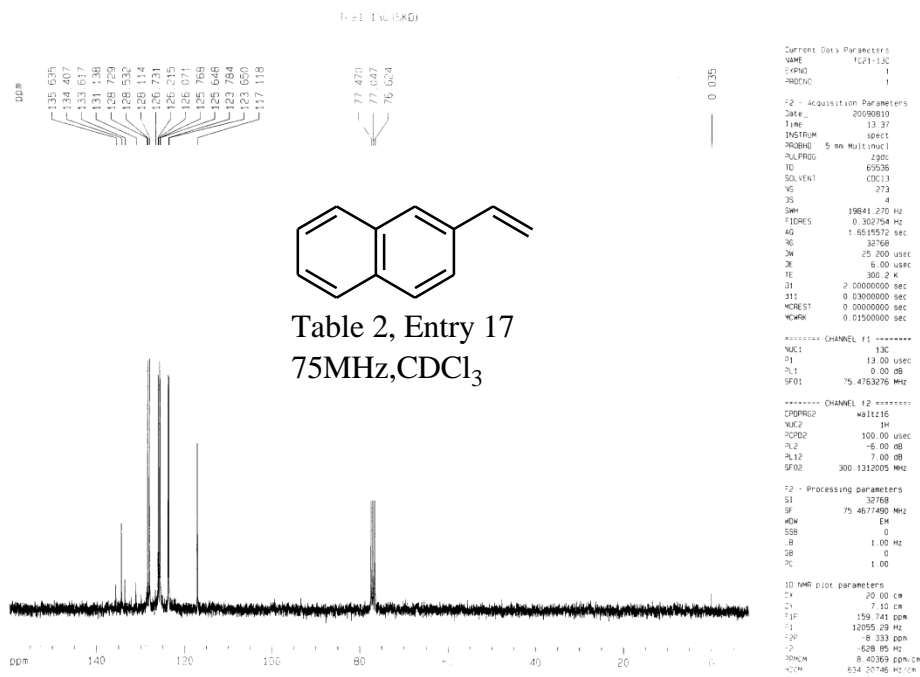

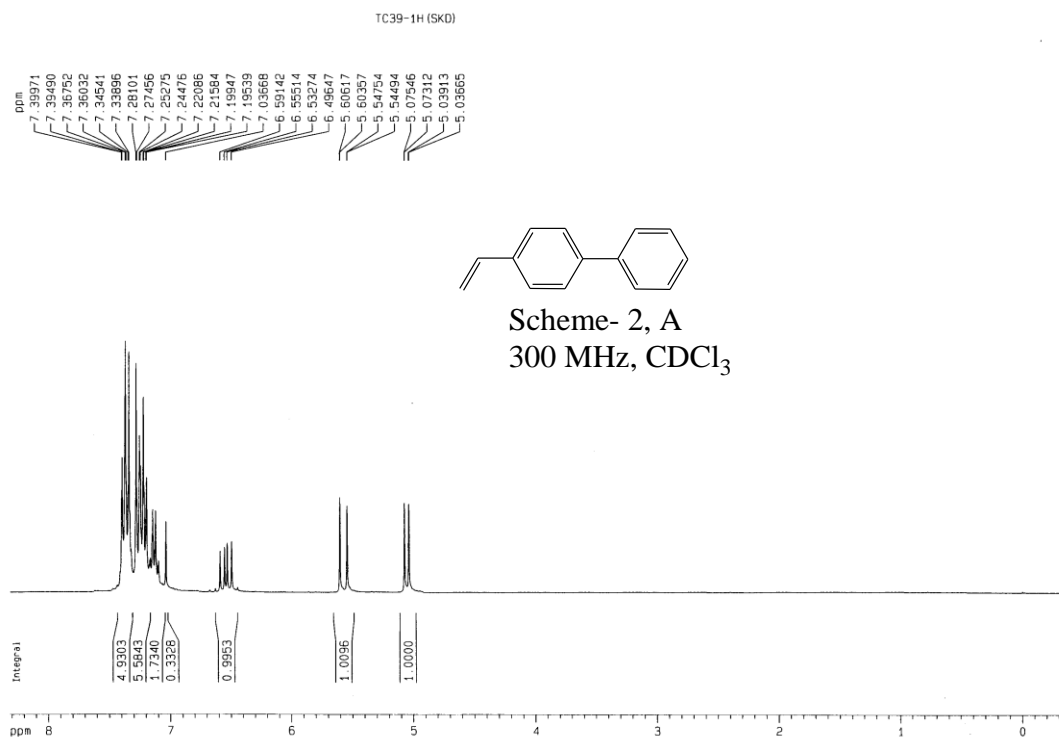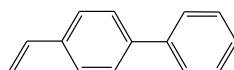

Scheme- 2, A  
 300 MHz, CDCl<sub>3</sub>

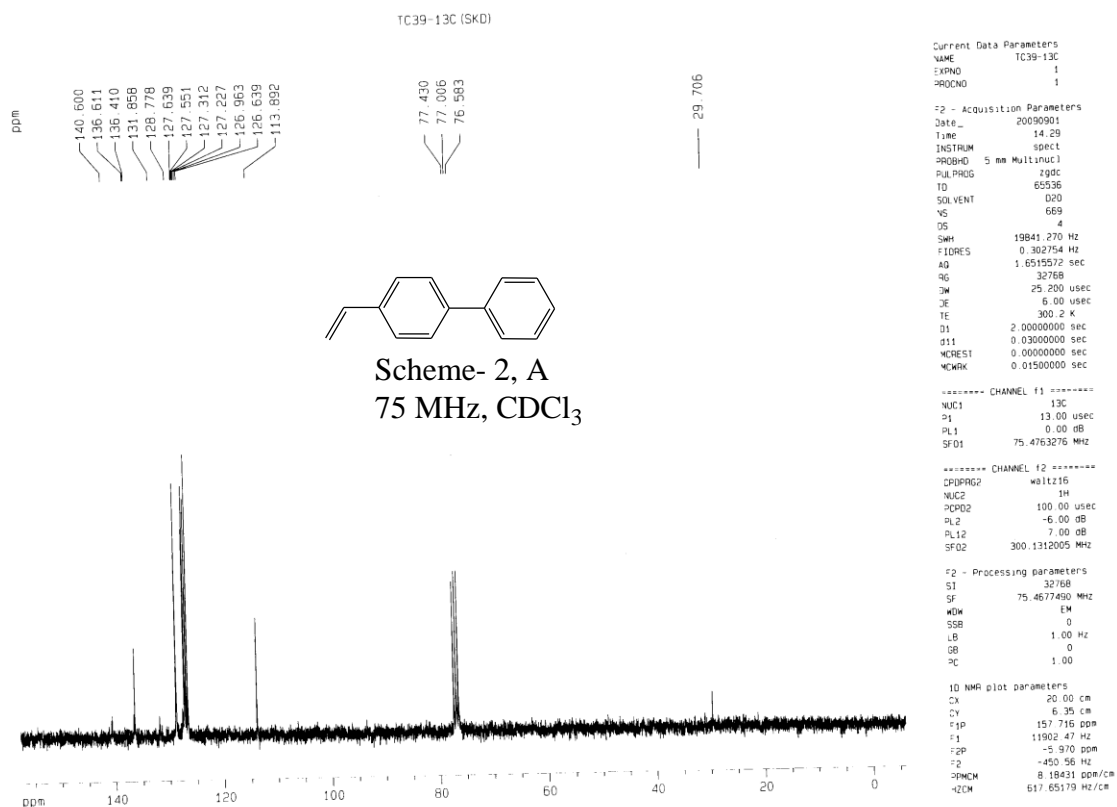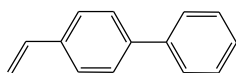

Scheme- 2, A  
 75 MHz, CDCl<sub>3</sub>

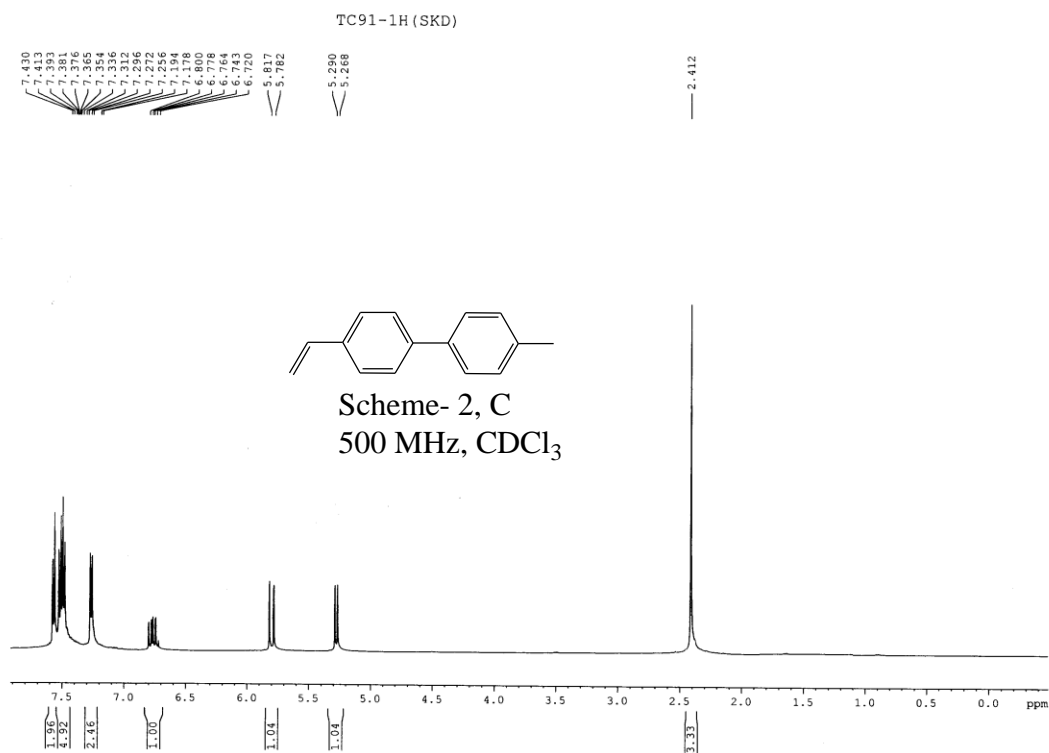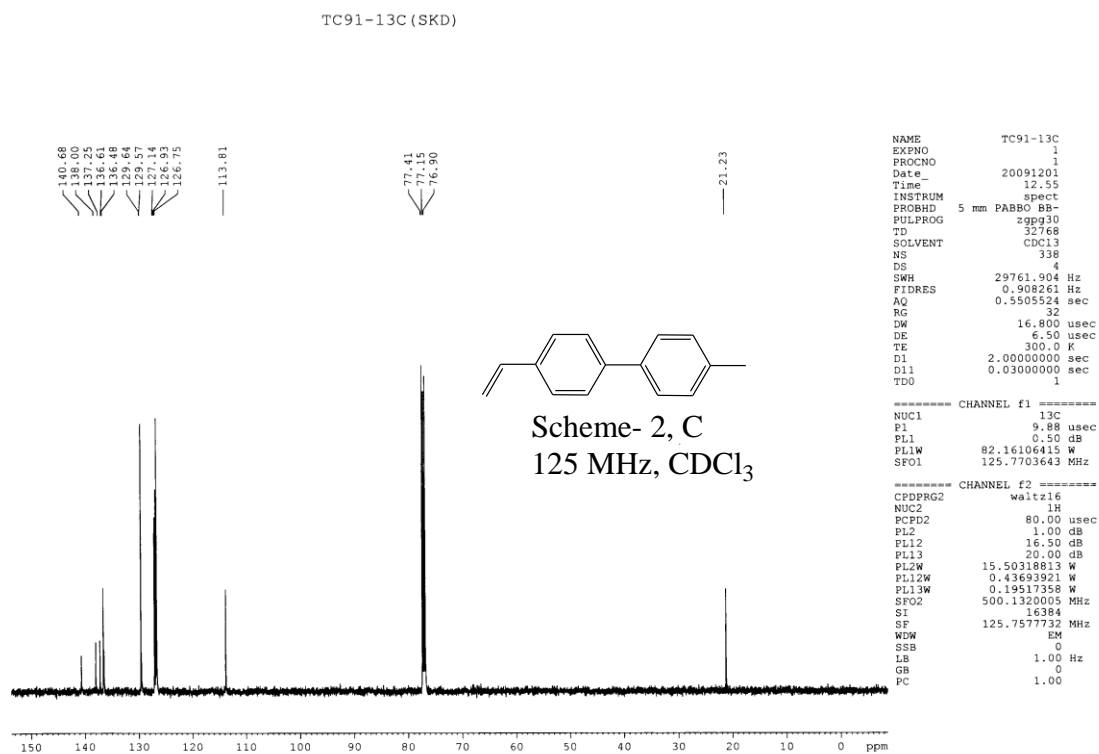

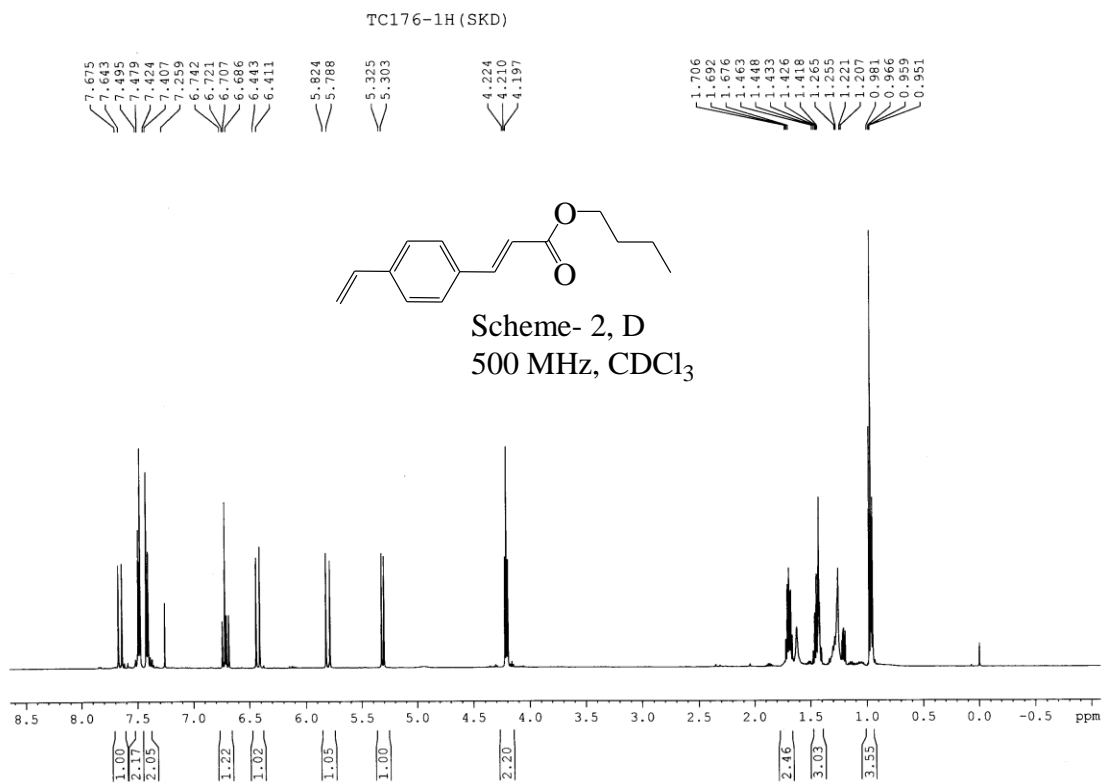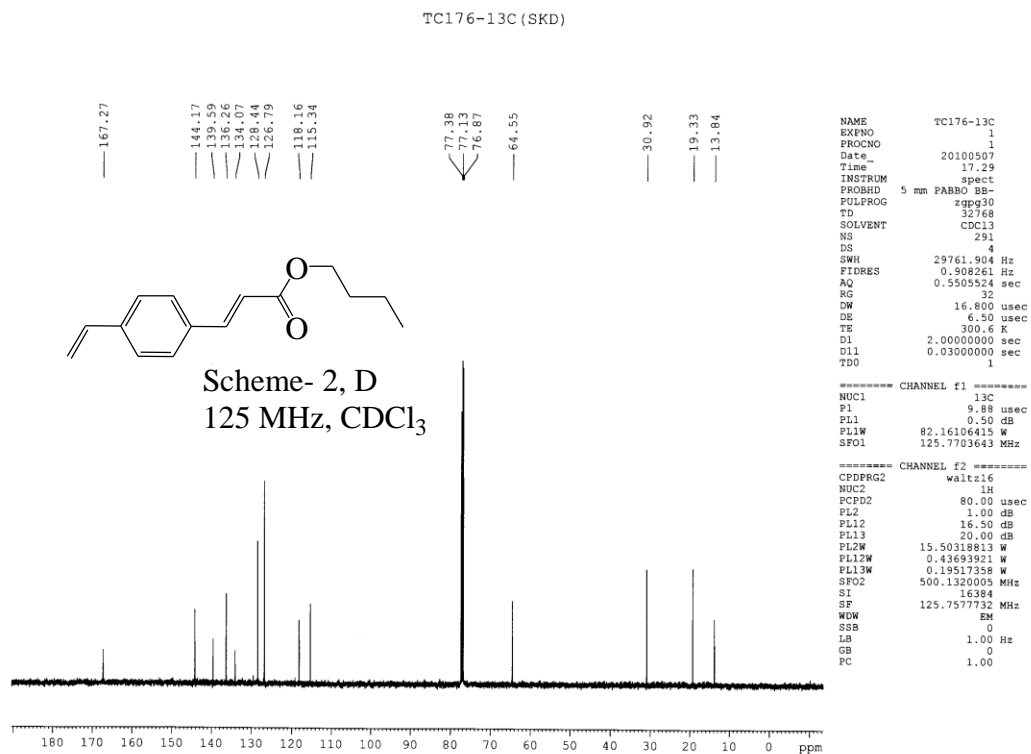

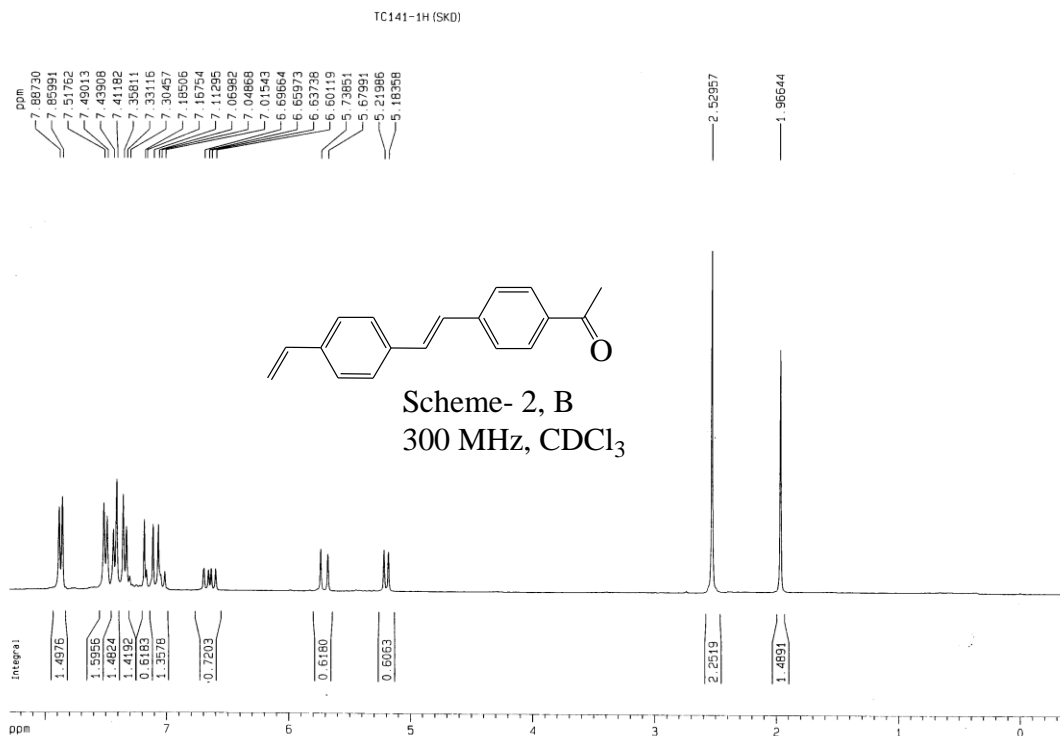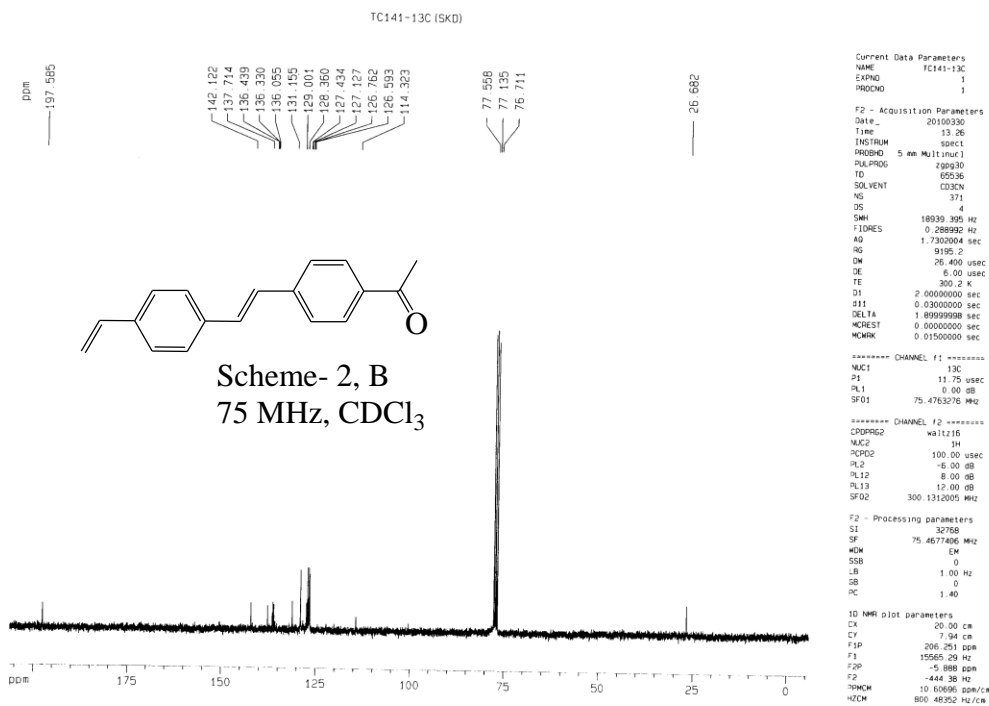

Supplement: c0nj01019g-1.pdf [file c0nj01019g-1.pdf]
